# Supplementary material
Source: PubMed Central journal article supplement (PMC1523305)

A

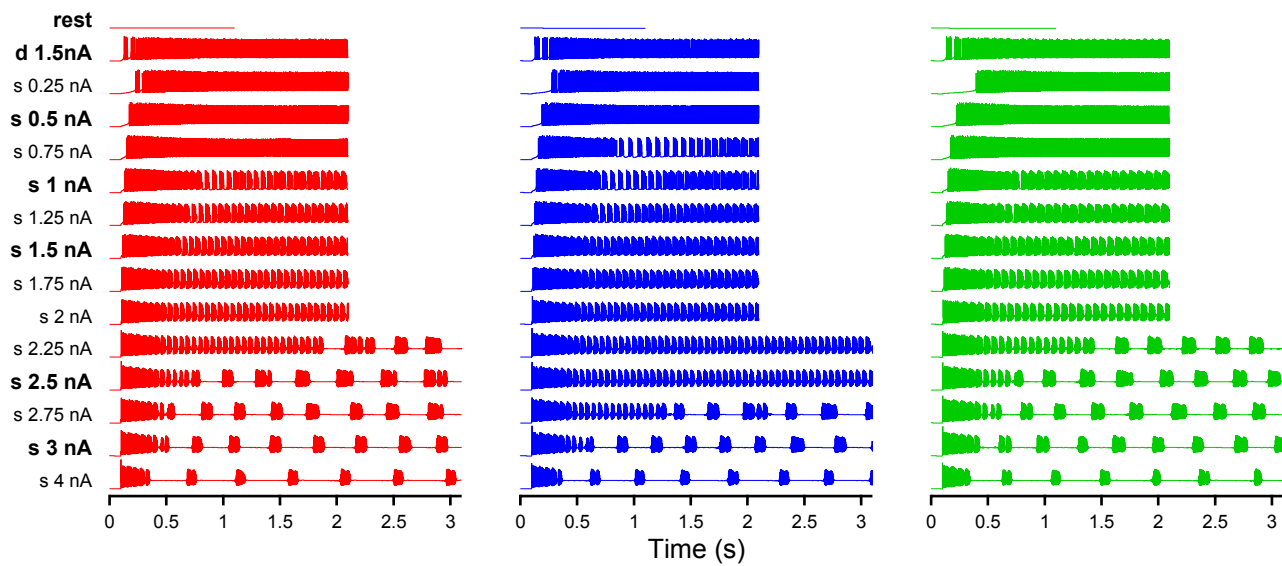

B

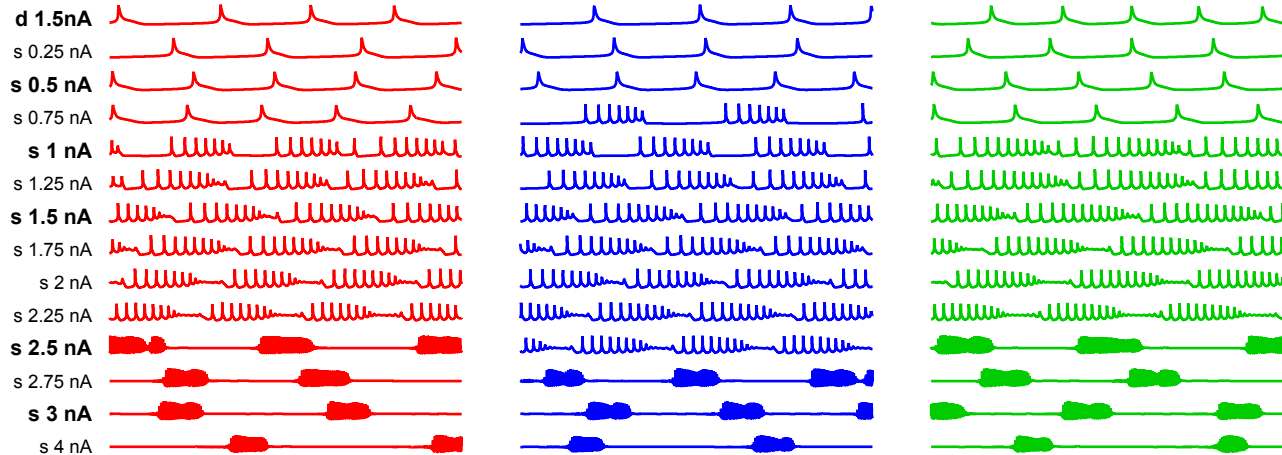

C

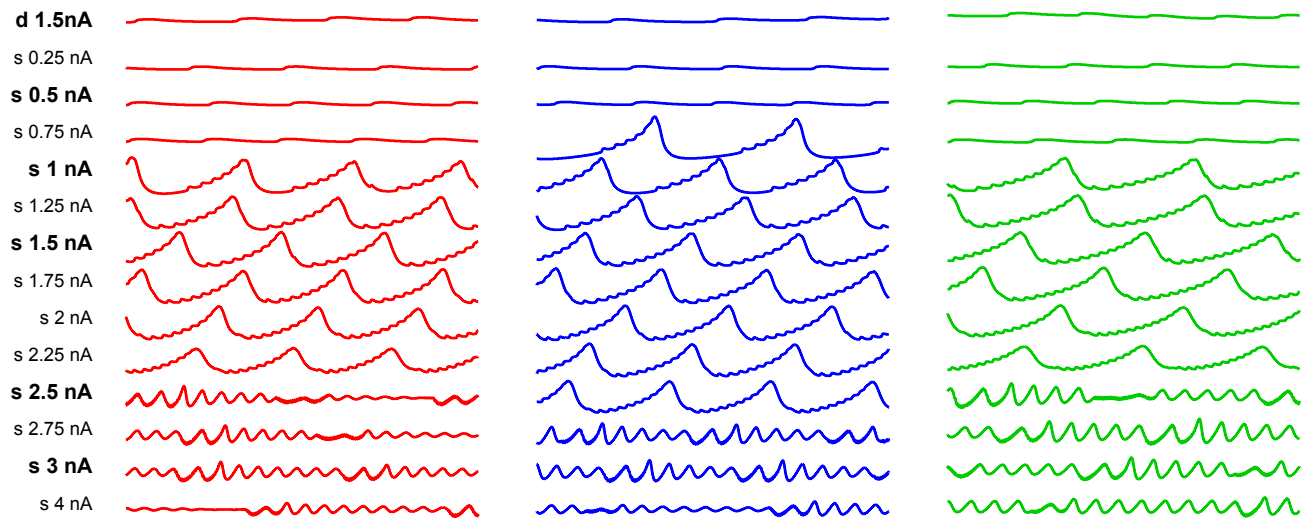

Supplement: pcbi.0020094.sg001.pdf [file pcbi.0020094.sg001.pdf]

A

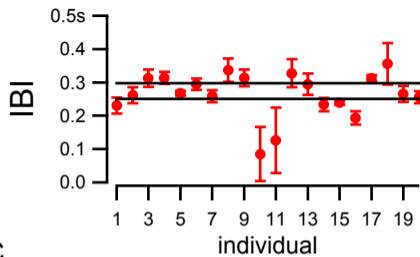

B

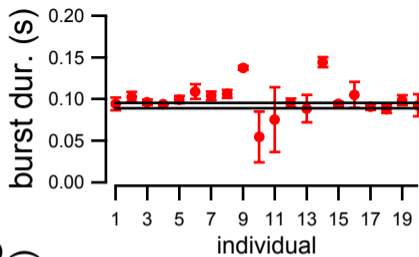

C

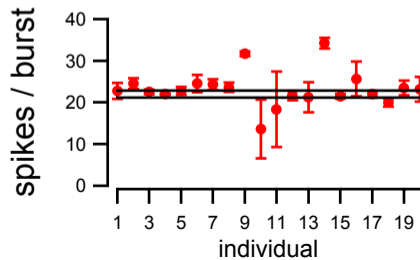

D

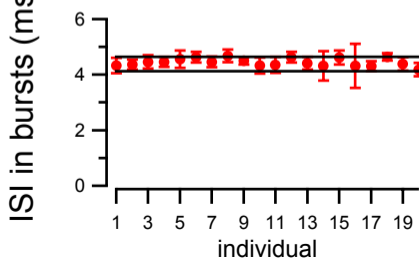

Supplement: pcbi.0020094.sg004.pdf [file pcbi.0020094.sg004.pdf]

A

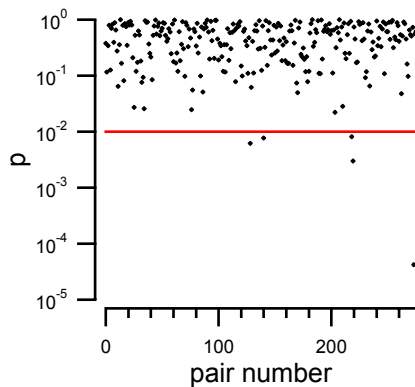

B

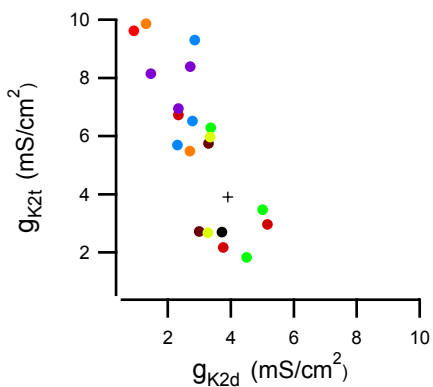

C

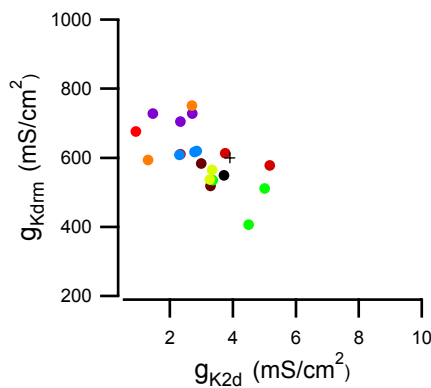

D

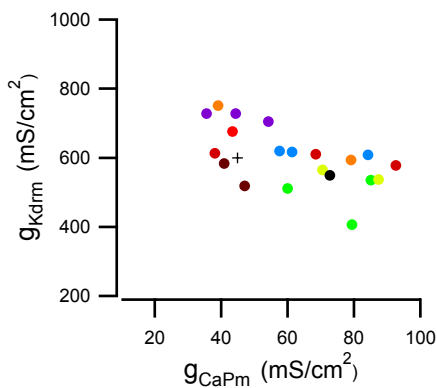

E

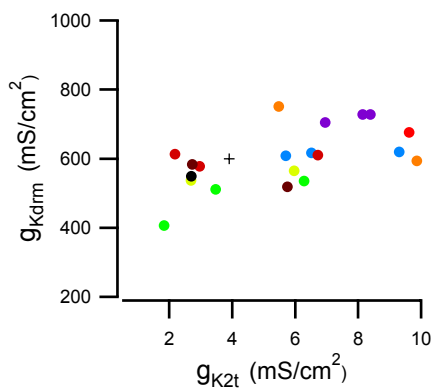

F

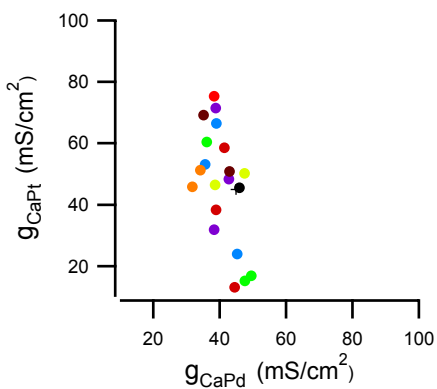

Supplement: pcbi.0020094.sg005.pdf [file pcbi.0020094.sg005.pdf]

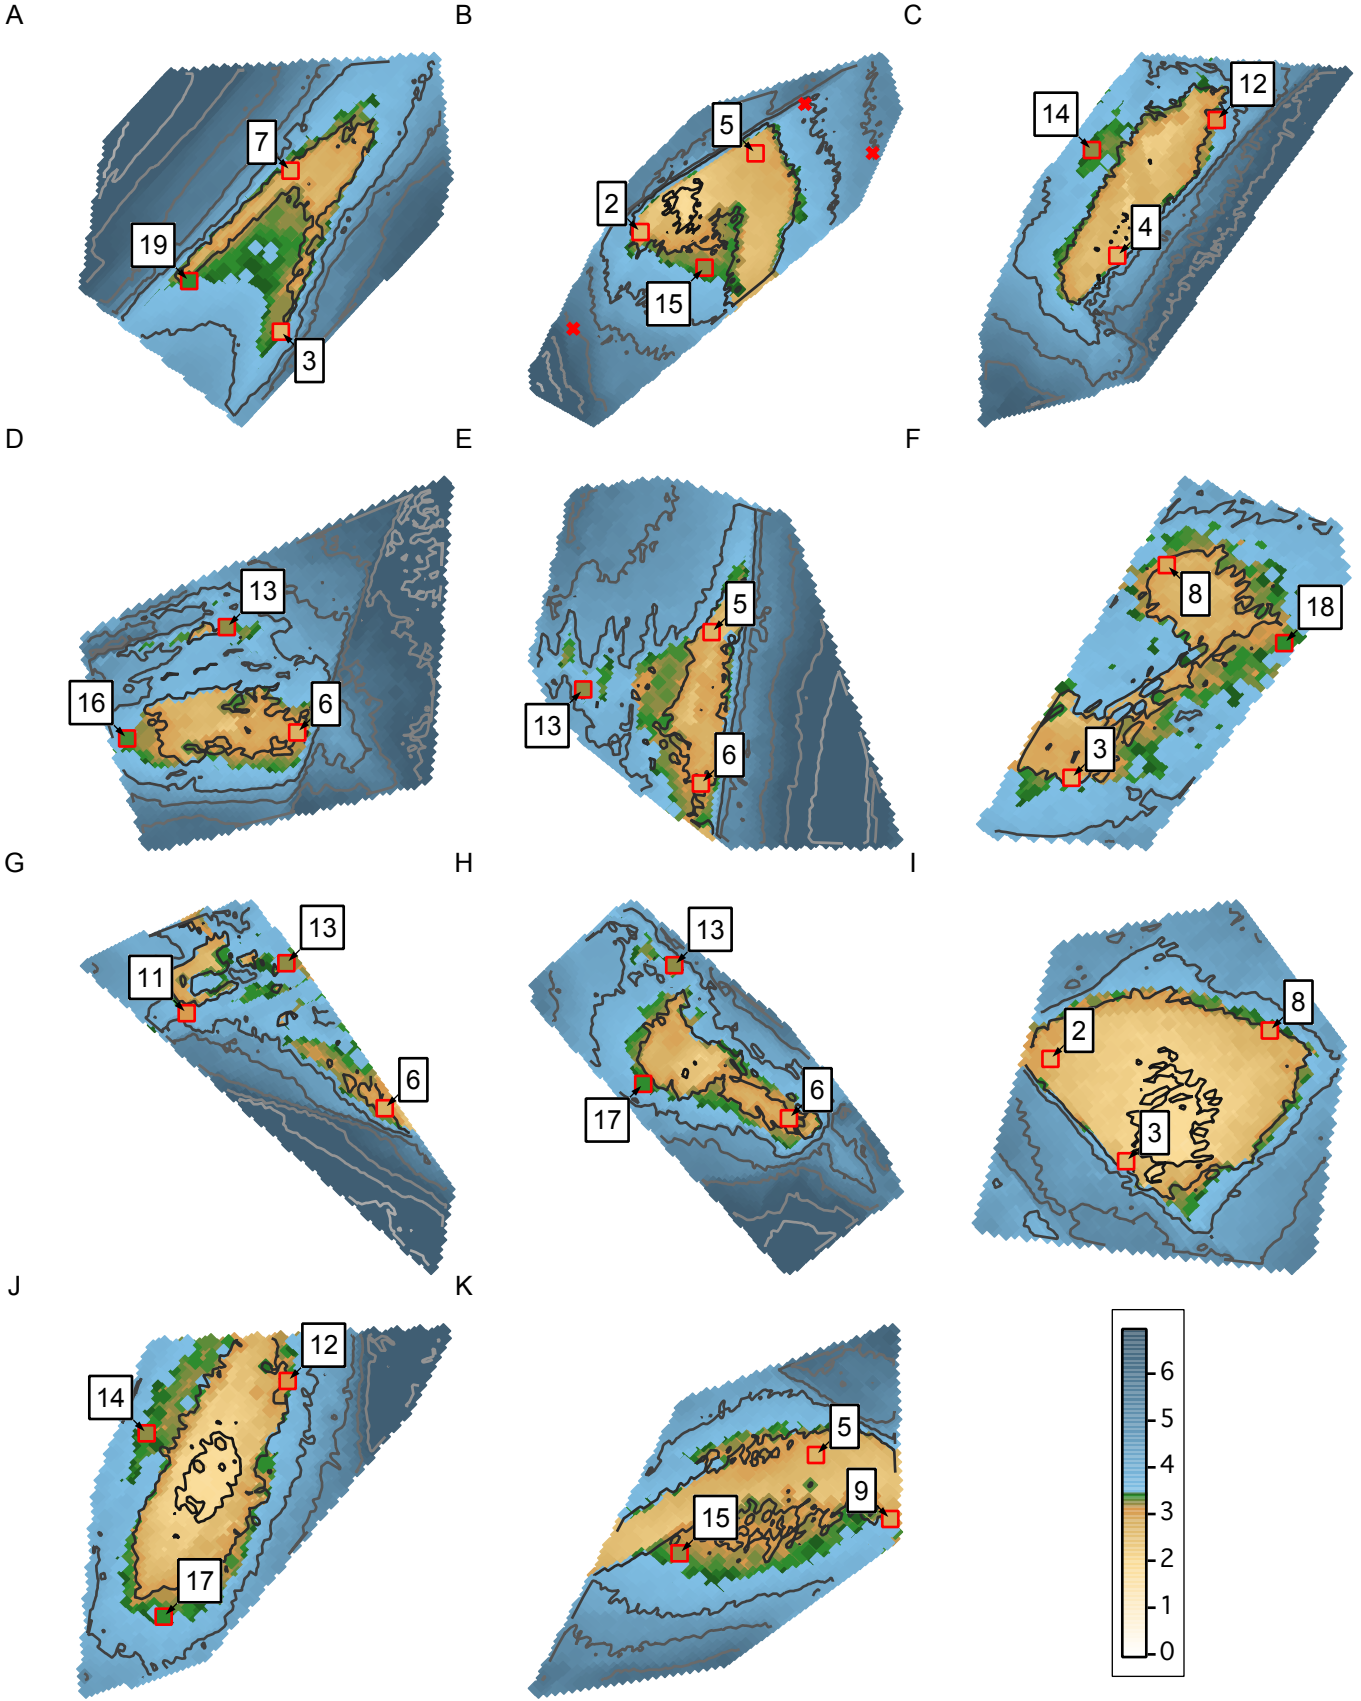

Supplement: pcbi.0020094.sg006.pdf [file pcbi.0020094.sg006.pdf]

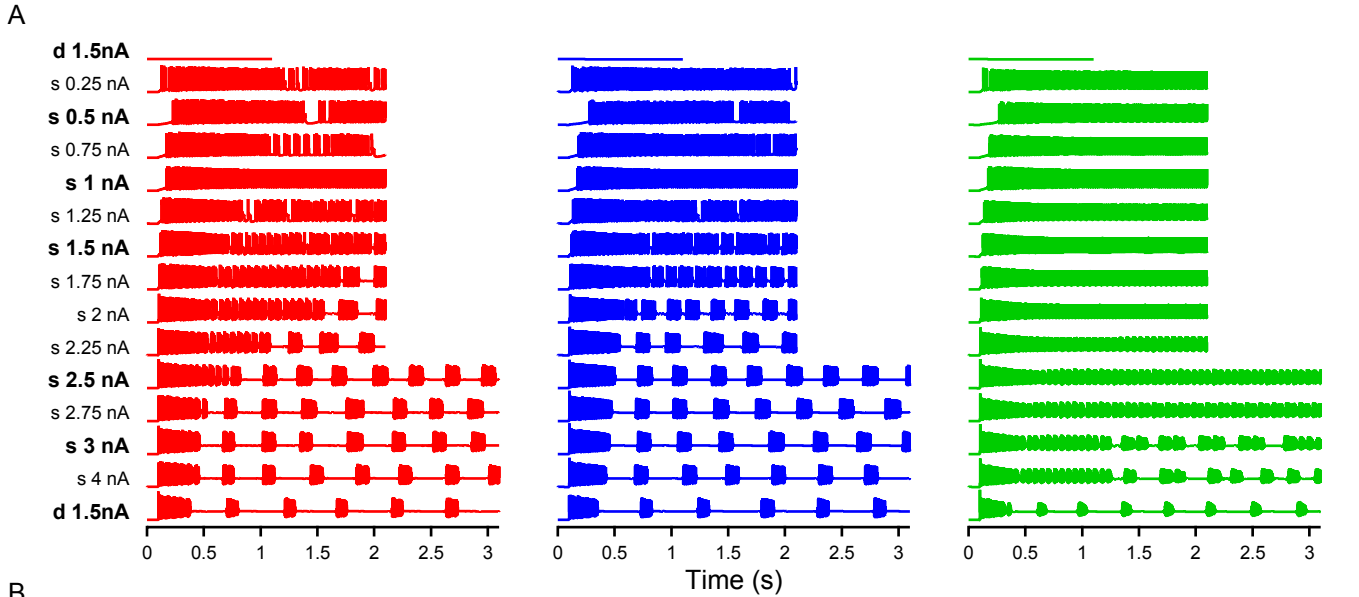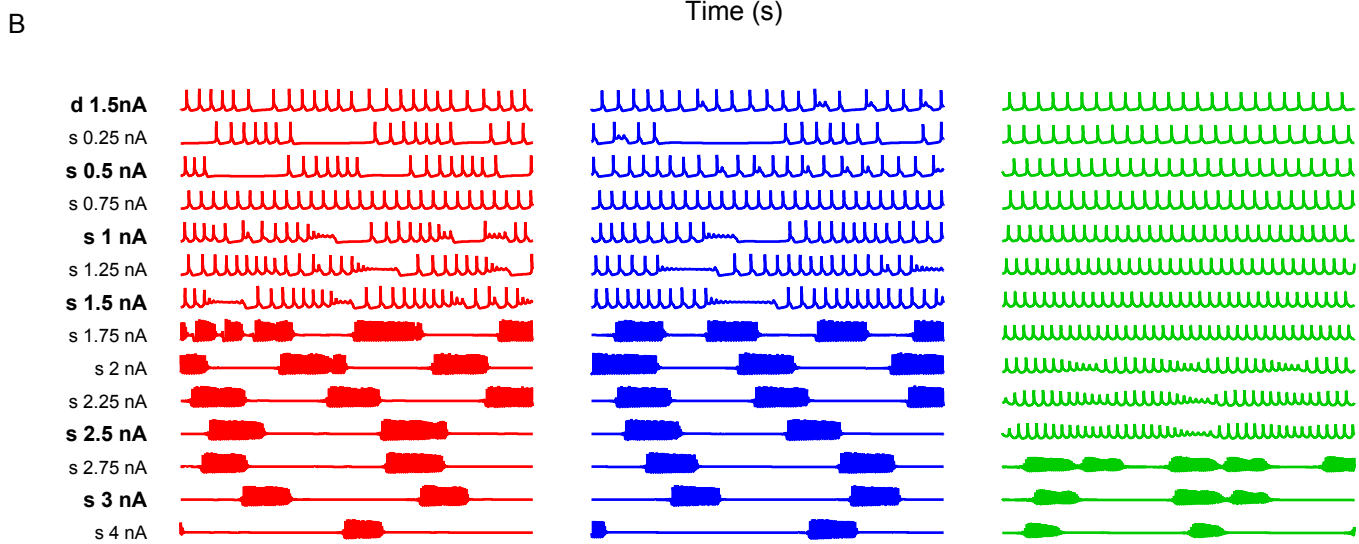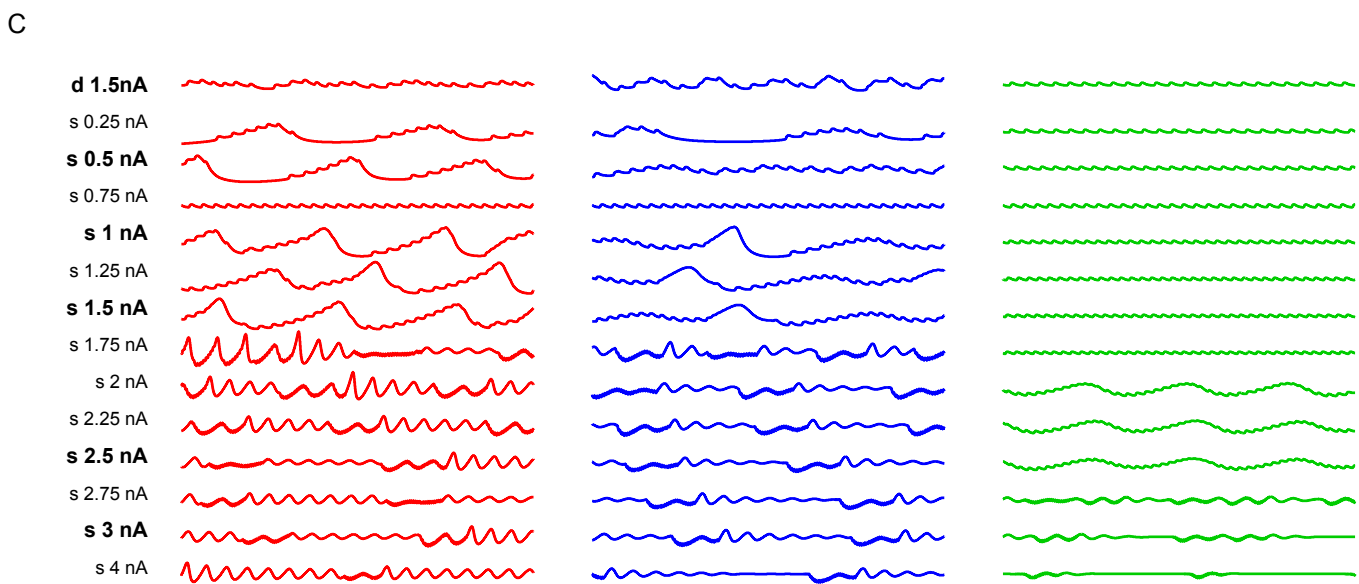

Supplement: pcbi.0020094.sg007.pdf [file pcbi.0020094.sg007.pdf]
